# Supplementary material for: Influence of body mass index on incidence and prognosis of acute myeloid leukemia and acute promyelocytic leukemia: A meta-analysis
Source: PubMed Central journal article supplement (PMC5740068; doi:10.1038/s41598-017-18278-x), 2017-12-21
Supplement: 41598_2017_18278_MOESM1_ESM.pdf [file 41598_2017_18278_MOESM1_ESM.pdf]

# **Influence of body mass index on incidence and prognosis of acute myeloid leukemia and acute promyelocytic leukemia: A meta-analysis**

Shufen Li<sup>1,\*</sup>, Li Chen<sup>2,\*</sup>, Wen Jin<sup>1,2</sup>, Xuefei Ma<sup>1</sup>, Yunlin Ma<sup>3</sup>, Fangyi Dong<sup>2</sup>,

Hongming Zhu<sup>2</sup>, Junmin Li<sup>2</sup>, Kankan Wang<sup>1,\*</sup>

1. State Key Laboratory of Medical Genomics and Shanghai Institute of Hematology, Ruijin Hospital, Shanghai Jiao Tong University School of Medicine, Shanghai 200025, China
2. Department of Hematology, Ruijin Hospital, Shanghai Jiao Tong University School of Medicine, Shanghai 200025, China
3. State Key Laboratory of Medical Genomics, Institute of Health Sciences, Shanghai Institutes for Biological Sciences, Chinese Academy of Sciences & Shanghai Jiao Tong University School of Medicine, University of Chinese Academy of Sciences, Shanghai, China.

\*. These authors contributed equally to this work.

Correspondence: Kankan Wang, State Key Laboratory of Medical Genomics and Shanghai Institute of Hematology, Ruijin Hospital, Shanghai Jiao Tong University of Medicine, 197 Ruijin Er Rd, Shanghai 200025, China; e-mail: kankanwang@shsmu.edu.cn; Tel: 86-21-64370045 ext 611109; Fax: 86-21-64743206.

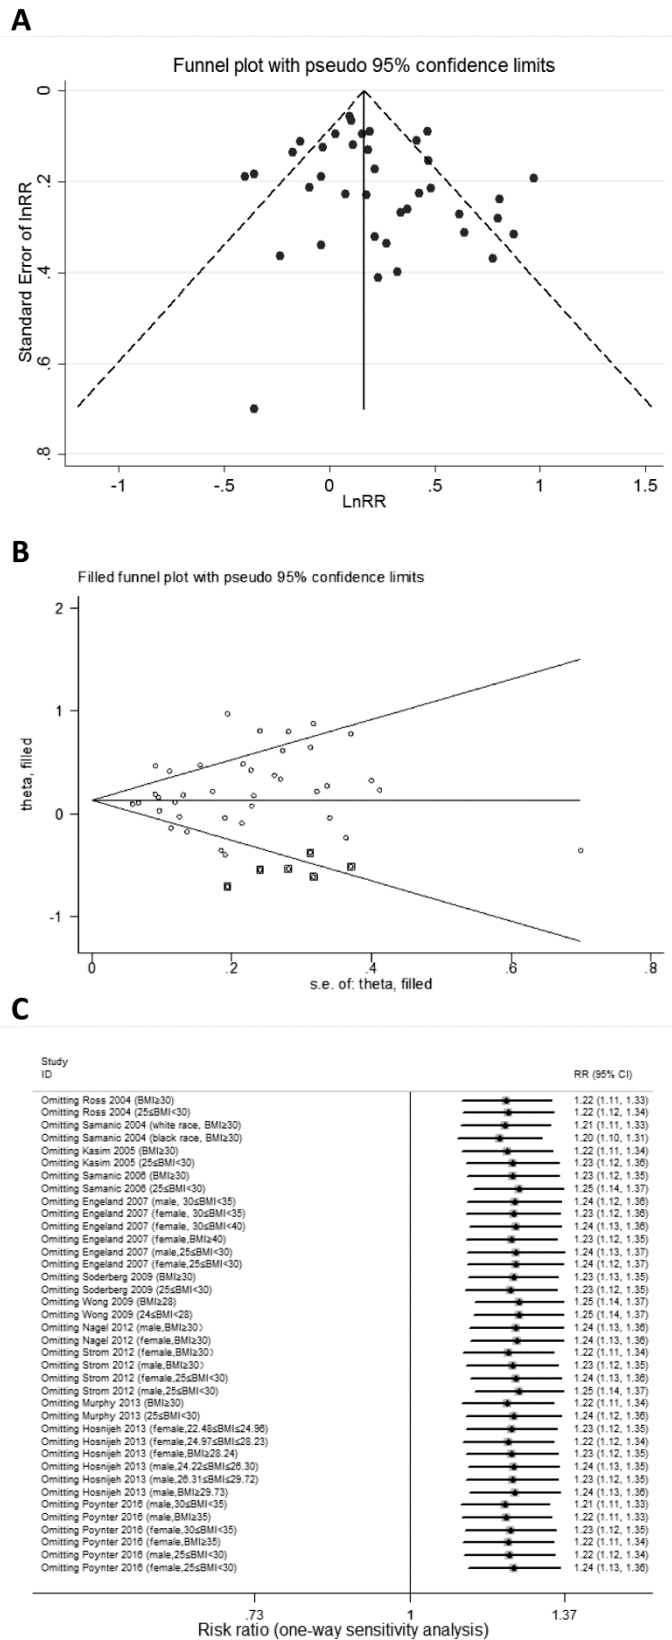

**Supplementary Figure 1. Supporting data for the association between BMI and relative risk of AML. (A)** Assessment of publication bias by funnel plots. **(B)** Identification of potential missing studies by the trim and fill analysis. **(C)** Confirmation of the stability of the pooled results by one-way sensitivity analysis.

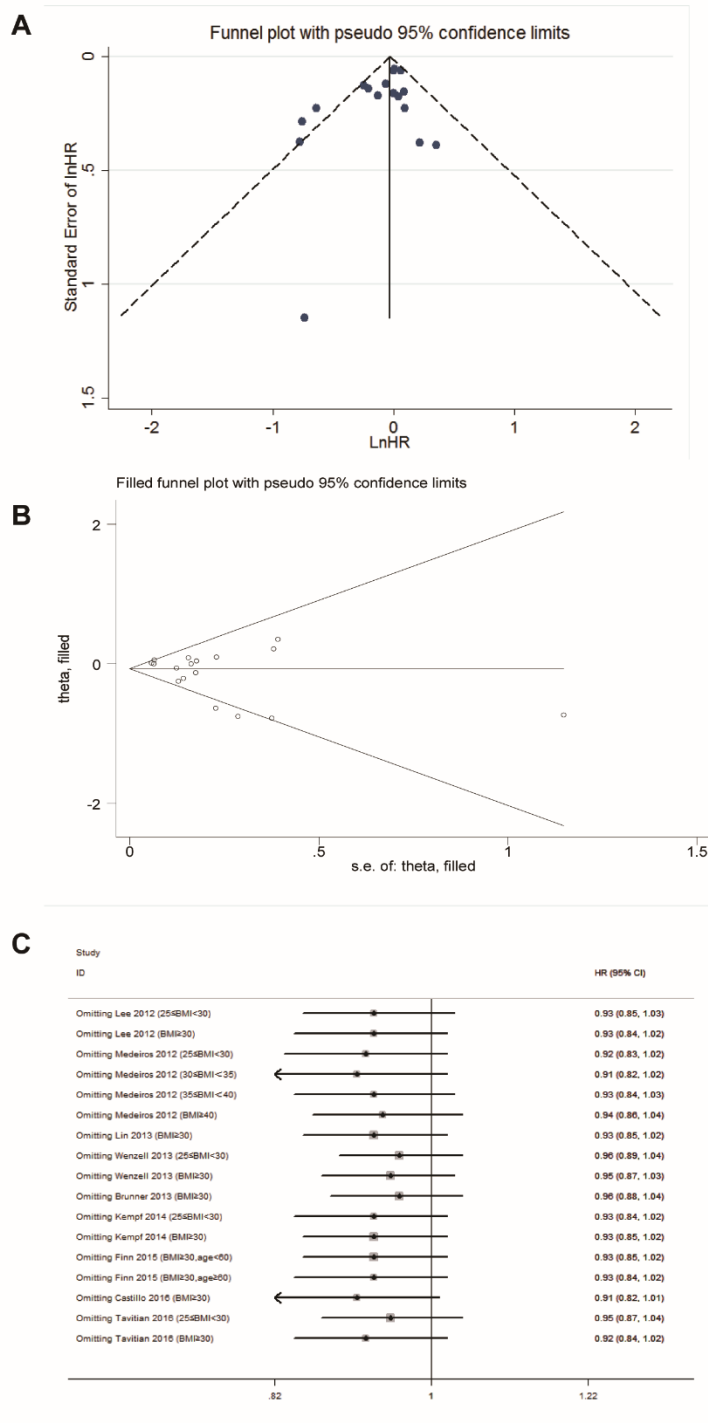

**Supplementary Figure 2. Supporting data for the association between BMI and overall survival of AML. (A)** Assessment of publication bias by funnel plots. **(B)** Identification of potential missing studies by the trim and fill analysis. **(C)** Confirmation of the stability of the pooled results by one-way sensitivity analysis.

| Study                                      | Quality indicators from the Newcastle-Ottawa scale |               |                     | Score |
|--------------------------------------------|----------------------------------------------------|---------------|---------------------|-------|
|                                            | Selection                                          | Comparability | Exposure or Outcome |       |
| <b>Studies on relative risk</b>            |                                                    |               |                     |       |
| Samanic 2004                               | 3                                                  | 2             | 3                   | 8     |
| Ross 2004                                  | 3                                                  | 2             | 3                   | 8     |
| Kasim 2005                                 | 3                                                  | 2             | 2                   | 7     |
| Samanic 2006                               | 4                                                  | 2             | 3                   | 9     |
| Engeland 2007                              | 4                                                  | 2             | 3                   | 9     |
| Wong 2009                                  | 3                                                  | 2             | 1                   | 6     |
| Soderberg 2009                             | 3                                                  | 2             | 3                   | 8     |
| Strom 2012                                 | 4                                                  | 2             | 2                   | 8     |
| Nagel 2012                                 | 3                                                  | 2             | 3                   | 8     |
| Murphy 2013                                | 3                                                  | 2             | 3                   | 8     |
| Hosnijeh 2013                              | 4                                                  | 2             | 3                   | 9     |
| Poynter 2016                               | 4                                                  | 2             | 2                   | 8     |
| <b>Studies on overall survival</b>         |                                                    |               |                     |       |
| Jeddi 2010                                 | 2                                                  | 2             | 3                   | 7     |
| Lee 2012                                   | 3                                                  | 2             | 3                   | 8     |
| Medeiros 2012                              | 3                                                  | 2             | 3                   | 8     |
| Lin 2013                                   | 3                                                  | 2             | 3                   | 8     |
| Wenzell 2013                               | 2                                                  | 2             | 3                   | 7     |
| Brunner 2013                               | 3                                                  | 2             | 3                   | 8     |
| Kempf 2014                                 | 3                                                  | 2             | 3                   | 8     |
| Wang 2015                                  | 2                                                  | 0             | 3                   | 5     |
| Finn 2015                                  | 2                                                  | 2             | 3                   | 7     |
| Castillo 2016                              | 3                                                  | 2             | 3                   | 8     |
| Tavitian 2016                              | 3                                                  | 2             | 3                   | 8     |
| <b>Studies on differentiation syndrome</b> |                                                    |               |                     |       |
| Jeddi 2010                                 | 2                                                  | 2             | 3                   | 7     |
| Breccia 2012                               | 2                                                  | 2             | 3                   | 7     |
| Leblebjian 2013                            | 2                                                  | 2             | 3                   | 7     |

**Supplementary Table S1: Assessment of study quality.**

| First author, year                                        | Treatment protocol                                                                            | Analysis of treatment for multiple factors |
|-----------------------------------------------------------|-----------------------------------------------------------------------------------------------|--------------------------------------------|
| <b>Studies about obesity and survival (AML)</b>           |                                                                                               |                                            |
| Castillo 2016                                             | CALGB9621,10503,19808 protocol                                                                | CALGB9621 vs 10503 vs 19808                |
| Tavitian 2016                                             | Induction: 3+7(DA/IA ) Consolidation: Data not given                                          | AlloSCT vs Non-alloSCT                     |
| Kempf 2014                                                | AML10, AML12, AML13 protocol                                                                  | Not available                              |
| Lin 2013*                                                 | Induction: 3+7(DA/IA ) Consolidation: Data not given                                          | Not available                              |
| Lee 2012                                                  | Induction: HiDAC+IDA Consolidation: Varied over time                                          | Treatment decade                           |
| Medeiros 2012                                             | SWOG (Trial S8600, S9031,S9126,S9333,S9500, S9617, S9918, and S0106) protocol                 | Not available                              |
| Finn 2015                                                 | Intensive and Non-intensive chemotherapy                                                      | Intensive vs Non-intensive chemotherapy    |
| Wenzell 2013                                              | Induction: 3+7 (IA/DA/MA) Consolidation: HiDAC or the scheme containing Ara-c or Auto/alloSCT | Not available                              |
| Brunner 2013                                              | Induction: Mainly for 3+7 (IA/DA) Consolidation: Data not given                               | Chemotherapy Dosing                        |
| <b>Studies about obesity and survival (APL)</b>           |                                                                                               |                                            |
| Jeddi 2010                                                | PETHEMA LPA99 protocol                                                                        | Same scheme                                |
| Castillo 2016                                             | C9710 protocol                                                                                | Same scheme                                |
| Wang 2015#                                                | Induction: ATRA+HHT, Consolidation: ATRA+HHT+Ara-c; Maintenance: ATRA+MTX+6-MP                | Same scheme                                |
| Breccia 2012                                              | GIMEMA AIDA-0493 and AIDA-2000 protocol                                                       | Not available                              |
| <b>Studies about obesity and Differentiation Syndrome</b> |                                                                                               |                                            |
| Jeddi 2010                                                | PETHEMA LPA99 protocol                                                                        | Same induction scheme                      |
| Breccia 2012                                              | GIMEMA AIDA-0493 and AIDA-2000 protocol                                                       | Same induction scheme                      |
| Leblebjian 2013                                           | ATRA+CT; ATRA+ATO; ATRA+GO; ATRA+ATO+GO; ATRA+Hu                                              | Different induction schemes were compared  |

**Supplementary Table S2: The treatment strategy in the eligible paper included in the analysis of the prognosis value of obesity in AML.** overweight: BMI  $\geq 25$  Obese: BMI  $\geq 30$ ; \*Obese: BMI  $\geq 130\%$  ideal body weight; #overweight: BMI  $\geq 23$ . DA: Doxorubicin+Cytarabine. IA: Idarubicin+Cytarabine. HiDAC: High dose cytarabine. IDA: Idarubicin. MA: Mitoxantrone+Cytarabine. Ara-c: Cytarabine. MTX: Methotrexate. HHT: Homoharringtonine. ATRA: All-trans-retinoic acid. 6-MP: Mercaptopurine. CT: Chemotherapy. ATO: Arsenic trioxide. GO: Gemtuzumab ozogamicin. Hu: Hydroxyurea. AlloSCT :Allogeneic stem cell transplantation. AutoSCT: Autologous stem cell transplantation.
